# Supplementary material for: Organic Nanobowls Modified Thin Film Composite Membrane for Enhanced Purification Performance toward Different Water Resources
Source: MDPI journal article supplement (doi:10.3390/membranes11050350), 2021-05-10
Supplement: s1 [file s1]

# Organic Nanobowls Modified Thin Film Composite Membrane for Enhanced Purification Performance toward Different Water Resources

Changjin Ou <sup>1</sup>, Sisi Li <sup>1</sup>, Zhongyi Wang <sup>1</sup>, Juan Qin <sup>1</sup>, Qian Wang <sup>2</sup>, Zhipeng Liao <sup>1,3,\*</sup>, Jiansheng Li <sup>3,\*</sup>

<sup>1</sup> Nantong Key Laboratory of Intelligent and New Energy Materials, School of Chemistry and Chemical Engineering, Nantong University, Nantong, 222100, China ocj1987@ntu.edu.cn (C.O); LISISI4408@163.com (S.L.); wzy564872358@163.com (Z.W.); qinjuan880816@ntu.edu.cn (J.Q.).

<sup>2</sup> School of Materials Science and Chemical Engineering, Xi'an Technological University, Xi'an, 710021, China; drifting\_leaf@126.com

<sup>3</sup> Key Laboratory of New Membrane Materials, Ministry of Industry and Information Technology, School of Environment and Biological Engineering, Nanjing University of Science and Technology, Nanjing, 210094, China.

\* Correspondence: zhpengliao@163.com (Z.L.); lijsh@njjust.edu.cn (J.L.)

**Table S1.** Comparisons of removal performances of various composite membranes toward seawater.

|     | Ca <sup>2+</sup> (%) | Mg <sup>2+</sup> (%) | Na <sup>+</sup> (%) | K <sup>+</sup> (%) | SO <sub>4</sub> <sup>2-</sup> (%) |
|-----|----------------------|----------------------|---------------------|--------------------|-----------------------------------|
| TFC | 22.91 ± 0.73         | 22.3 ± 0.58          | 15.71 ± 0.23        | 6.28 ± 0.45        | 76.92 ± 1.71                      |
| TFN | 34.44 ± 0.32         | 36.4 ± 3.06          | 14.73 ± 2.1         | 8.34 ± 1.02        | 76.99 ± 2.56                      |
| CM  | 27.8 ± 0.12          | 27.25 ± 0.43         | 22.2 ± 0.17         | 10.39 ± 0.25       | 78.17 ± 0.17                      |

  

|     | NO <sub>3</sub> <sup>-</sup> (%) | Cl <sup>-</sup> (%) | TOC (%)      | pH          | Viscosity (cP) |
|-----|----------------------------------|---------------------|--------------|-------------|----------------|
| TFC | 14.44 ± 0.8                      | 5.2 ± 0.52          | 82.61 ± 0.74 | 7.95 ± 0.21 | Nondetected    |
| TFN | 14.58 ± 1.92                     | 10.72 ± 0.62        | 81.29 ± 3.95 | 7.76 ± 0.14 | Nondetected    |
| CM  | 14.57 ± 0.31                     | 7.46 ± 0.04         | 85.16 ± 0.38 | 7.82 ± 0.08 | Nondetected    |

The initial seawater conditions: Ca<sup>2+</sup> of 0.22 g/L, Mg<sup>2+</sup> of 0.61 g/L, Na<sup>+</sup> of 4.01 g/L, K<sup>+</sup> of 0.48 mg/L, SO<sub>4</sub><sup>2-</sup> of 3.71 g/L, NO<sub>3</sub><sup>-</sup> of 15.29 mg/L, Cl<sup>-</sup> of 10.58 g/L, TOC of 21.49 mg/L, pH of 8.02 and Viscosity of 1.50 cP

**Table S2.** Comparisons of removal performances of various composite membranes toward tap water.

|     | Ca <sup>2+</sup> (%) | Mg <sup>2+</sup> (%) | SO <sub>4</sub> <sup>2-</sup> (%) | Cl <sup>-</sup> (%) | TOC (%)      | pH          |
|-----|----------------------|----------------------|-----------------------------------|---------------------|--------------|-------------|
| TFC | 79.71 ± 0.85         | 68.53 ± 0.42         | 74.52 ± 0.78                      | 49.54 ± 1.07        | 84.09 ± 2.9  | 6.78 ± 0.29 |
| TFN | 84.36 ± 2.11         | 76.38 ± 2.17         | 77.54 ± 1.24                      | 57.49 ± 1.70        | 83.44 ± 0.25 | 6.94 ± 0.07 |
| CM  | 83.49 ± 0.37         | 72.51 ± 0.67         | 77.5 ± 0.36                       | 55.16 ± 0.32        | 83.98 ± 0.27 | 6.95 ± 0.09 |

The initial tap water conditions: Ca<sup>2+</sup> of 43.80 mg/L, Mg<sup>2+</sup> of 13.50 mg/L, SO<sub>4</sub><sup>2-</sup> of 36.67 mg/L, Cl<sup>-</sup> of 47.05 mg/L, TOC of 3.32 mg/L and pH of 6.64.

**Table S3.** Comparisons of removal performances of various composite membranes toward municipal effluent.

|     | Ca <sup>2+</sup> (%) | Mg <sup>2+</sup> (%) | SO <sub>4</sub> <sup>2-</sup> (%) | Cl <sup>-</sup> (%) | TOC (%)      | pH          |
|-----|----------------------|----------------------|-----------------------------------|---------------------|--------------|-------------|
| TFC | 68.91 ± 1.43         | 76.74 ± 0.89         | 64.3 ± 1.13                       | 74.41 ± 0.58        | 83.04 ± 1.36 | 6.86 ± 0.07 |
| TFN | 72.68 ± 0.73         | 79.64 ± 2.65         | 64.09 ± 0.58                      | 74.15 ± 0.37        | 83.23 ± 0.93 | 6.87 ± 0.04 |
| CM  | 69.44 ± 0.25         | 79.08 ± 0.43         | 66.05 ± 0.33                      | 75.67 ± 0.10        | 83.71 ± 0.29 | 7.00 ± 0.02 |

The initial municipal effluent water conditions: Ca<sup>2+</sup> of 70.61 mg/L, Mg<sup>2+</sup> of 16.6 mg/L, SO<sub>4</sub><sup>2-</sup> of 33.95 mg/L, Cl<sup>-</sup> of 39.77 mg/L, TOC of 35.45 mg/L and pH of 6.15.

**Table S4.** Comparisons of removal performances of various composite membranes toward Ni<sup>2+</sup> wastewater.

|     | Ni <sup>2+</sup> (%) | Ca <sup>2+</sup> (%) | Mg <sup>2+</sup> (%) | SO <sub>4</sub> <sup>2-</sup> (%) | Cl <sup>-</sup> (%) | TOC (%)      | pH          |
|-----|----------------------|----------------------|----------------------|-----------------------------------|---------------------|--------------|-------------|
| TFC | 90.92 ± 0.53         | 82.15 ± 0.68         | 61.21 ± 1.54         | 94.47 ± 0.59                      | 83.71 ± 1.38        | 83.31 ± 1.61 | 6.06 ± 0.17 |
| TFN | 95.53 ± 1.88         | 93.07 ± 0.24         | 75.67 ± 1.89         | 94.43 ± 0.84                      | 86.61 ± 0.82        | 81.81 ± 1.34 | 6.13 ± 0.26 |
| CM  | 94.04 ± 0.17         | 91.04 ± 0.14         | 70.23 ± 0.21         | 95.02 ± 0.33                      | 85.47 ± 0.41        | 84.59 ± 0.43 | 6.29 ± 0.04 |

The initial Ni<sup>2+</sup> water conditions: Ni<sup>2+</sup> of 272.45 mg/L, Ca<sup>2+</sup> of 19.51 mg/L, Mg<sup>2+</sup> of 14.3 mg/L, SO<sub>4</sub><sup>2-</sup> of 1712.52 mg/L, Cl<sup>-</sup> of 703.94 mg/L, TOC of 327.75 mg/L and pH of 2.68; The Ni<sup>2+</sup> water conditions after the adjust of pH: Ni<sup>2+</sup> of 203.21 mg/L, Ca<sup>2+</sup> of 11.43 mg/L, Mg<sup>2+</sup> of 13.2 mg/L, SO<sub>4</sub><sup>2-</sup> of 1947.80 mg/L, Cl<sup>-</sup> of 599.31 mg/L, TOC of 127.22 mg/L and pH of 5.94.

**Table S5.** Comparisons of removal performances of various composite membranes toward Cr<sup>3+</sup> wastewater.

|     | Cr <sup>3+</sup> (%) | Ca <sup>2+</sup> (%) | Mg <sup>2+</sup> (%) | SO <sub>4</sub> <sup>2-</sup> (%) | Cl <sup>-</sup> (%) | TOC (%)      | pH          |
|-----|----------------------|----------------------|----------------------|-----------------------------------|---------------------|--------------|-------------|
| TFC | 98.62 ± 0.19         | 73.68 ± 0.87         | 58.06 ± 1.79         | 94.60 ± 0.44                      | 59.41 ± 1.19        | 88.14 ± 1.33 | 6.17 ± 0.13 |
| TFN | 99.35 ± 0.24         | 77.29 ± 1.92         | 64.7 ± 1.53          | 95.30 ± 0.11                      | 67.69 ± 1.04        | 88.76 ± 1.19 | 6.34 ± 0.09 |
| CM  | 99.13 ± 0.13         | 77.3 ± 0.46          | 62.16 ± 0.38         | 95.07 ± 0.33                      | 64.95 ± 0.34        | 90.11 ± 0.44 | 6.76 ± 0.09 |

The initial Cr<sup>3+</sup> water conditions: Cr<sup>3+</sup> of 3361.72 mg/L, Ca<sup>2+</sup> of 20.48 mg/L, Mg<sup>2+</sup> of 7.97 mg/L, SO<sub>4</sub><sup>2-</sup> of 21142.58 mg/L, Cl<sup>-</sup> of 765.53 mg/L, TOC of 1369.32 mg/L and pH of 1.53; The Cr<sup>3+</sup> water conditions after the adjust of pH: Cr<sup>3+</sup> of 1266.95 mg/L, Ca<sup>2+</sup> of 10.18 mg/L, Mg<sup>2+</sup> of 2.51 mg/L, SO<sub>4</sub><sup>2-</sup> of 18156.99 mg/L, Cl<sup>-</sup> of 557.05 mg/L, TOC of 969.88 mg/L and pH of 5.73.

**Table S6.** Comparisons of removal performances of various composite membranes toward Zn<sup>2+</sup> wastewater.

|     | Zn <sup>2+</sup> (%) | Ca <sup>2+</sup> (%) | Mg <sup>2+</sup> (%) | SO <sub>4</sub> <sup>2-</sup> (%) | Cl <sup>-</sup> (%) | TOC (%)      | pH          |
|-----|----------------------|----------------------|----------------------|-----------------------------------|---------------------|--------------|-------------|
| TFC | 98.72 ± 0.29         | 74.24 ± 1.72         | 58.30 ± 1.92         | 91.46 ± 0.61                      | 75.43 ± 1.78        | 82.00 ± 0.68 | 6.46 ± 0.11 |
| TFN | 99.28 ± 0.20         | 79.67 ± 0.89         | 71.40 ± 1.23         | 91.59 ± 1.12                      | 79.10 ± 0.64        | 83.25 ± 0.49 | 6.66 ± 0.08 |
| CM  | 98.99 ± 0.09         | 75.85 ± 0.31         | 68.48 ± 0.34         | 91.73 ± 0.20                      | 77.96 ± 0.06        | 84.37 ± 0.15 | 6.7 ± 0.05  |

The initial Zn<sup>2+</sup> water conditions: Zn<sup>2+</sup> of 2908.37 mg/L, Ca<sup>2+</sup> of 97.30 mg/L, Mg<sup>2+</sup> of 25.30 mg/L, SO<sub>4</sub><sup>2-</sup> of 1195.82 mg/L, Cl<sup>-</sup> of 5023.85 mg/L, TOC of 69.6 mg/L and pH of 2.56; The Zn<sup>2+</sup> water conditions after the adjust of pH: Zn<sup>2+</sup> of 2070.90 mg/L, Ca<sup>2+</sup> of 48.97 mg/L, Mg<sup>2+</sup> of 12.66 mg/L, SO<sub>4</sub><sup>2-</sup> of 505.21 mg/L, Cl<sup>-</sup> of 4755.93 mg/L, TOC of 37.1 mg/L and pH of 6.3.

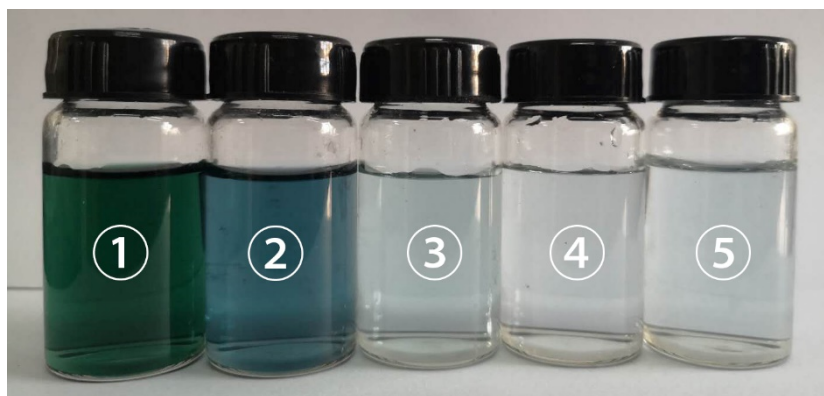

**Figure S1.** Comparisons of the photograph of  $\text{Cr}^{3+}$  wastewater before and after treatment: ① origin wastewater, ② after pH adjustment; effluent of ③ TFC, ④ TFN and ⑤ CM membranes.

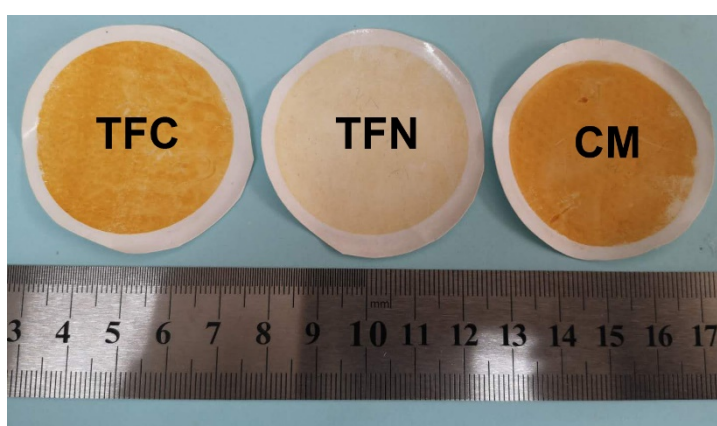

**Figure S2.** Photograph of fouling extent of composite membranes of separating  $\text{Zn}^{2+}$  wastewater.
